# Supplementary material for: Fabrication and Characterization of a Composite Ni-SDC Fuel Cell Cathode Reinforced by Ni Foam
Source: MDPI journal article supplement (doi:10.3390/ma15144891), 2022-07-14
Supplement: s1 [file s1]

# Fabrication and characterization of composite Ni-SDC fuel cell cathode reinforced by Ni foam

Gabriela Komorowska<sup>1</sup>, Tomasz Wejrzanowski<sup>1</sup>, Jan Jamroz<sup>2</sup>, Agnieszka Jastrzębska<sup>1</sup>, Wojciech Wróbel<sup>2</sup>, Shu-Yi Tsai<sup>3</sup>, Kuan-Zong Fung<sup>3</sup>

<sup>1</sup> Faculty of Materials Science and Engineering, Warsaw University of Technology, Woloska 141, 02-507 Warsaw, Poland

<sup>2</sup> Faculty of Physics, Warsaw University of Technology, Koszykowa 75, 00-662 Warszawa Warsaw, Poland

<sup>3</sup> National Cheng Kung University Department of MSE

\*Correspondence: gabriela.komorowska.dokt@pw.edu.pl (G.K.); tomasz.wejrzanowski@pw.edu.pl (T.W.)

Table S1. Crystal and Refinement parameters for all measured composite materials. Estimated standard deviations are given in parentheses.

| Sample                        | Ni 100%                 |                                                      |
|-------------------------------|-------------------------|------------------------------------------------------|
| Chemical formula              | Ni                      | -                                                    |
| Crystal system                | Cubic                   | -                                                    |
| Space group                   | <i>Fm-3m</i>            | -                                                    |
| Unit cell dimensions (Å)      | $a = 3.525553(8)$       | -                                                    |
| Volume (Å <sup>3</sup> )      | 43.821(1)               | -                                                    |
| Weight fraction (%)           | 100                     | -                                                    |
| Density (g cm <sup>-3</sup> ) | 8.897                   | -                                                    |
| R-factors                     | Phase residuals         |                                                      |
|                               | R <sub>F</sub> =0.0167  | -                                                    |
|                               | Total                   |                                                      |
|                               | R <sub>wp</sub> =0.0249 |                                                      |
| Sample                        | Ni 80%, SDC 20%         |                                                      |
| Chemical formula              | Ni                      | Ce <sub>0.8</sub> Sm <sub>0.2</sub> O <sub>1.9</sub> |
| Crystal system                | Cubic                   | Cubic                                                |
| Space group                   | <i>Fm-3m</i>            | <i>Fm-3m</i>                                         |
| Unit cell dimensions (Å)      | $a = 3.52395(1)$        | $a = 5.4585(1)$                                      |
| Volume (Å <sup>3</sup> )      | 43.761(1)               | 162.64(1)                                            |
| Weight fraction (%)           | 82.65(7)                | 17.3(2)                                              |

|                               |                         |                        |
|-------------------------------|-------------------------|------------------------|
| Density (g cm <sup>-3</sup> ) | 8.909                   | 7.047                  |
| R-factors                     | Phase residuals         |                        |
|                               | R <sub>F</sub> =0.0067  | R <sub>F</sub> =0.0495 |
|                               | Total                   |                        |
|                               | R <sub>wp</sub> =0.0203 |                        |

|                               |                         |                                                      |
|-------------------------------|-------------------------|------------------------------------------------------|
| Sample                        | Ni 60%, SDC 40%         |                                                      |
| Chemical formula              | Ni                      | Ce <sub>0.8</sub> Sm <sub>0.2</sub> O <sub>1.9</sub> |
| Crystal system                | Cubic                   | Cubic                                                |
| Space group                   | <i>Fm-3m</i>            | <i>Fm-3m</i>                                         |
| Unit cell dimensions (Å)      | <i>a</i> = 3.52449(1)   | <i>a</i> = 5.45852(9)                                |
| Volume (Å <sup>3</sup> )      | 43.781(1)               | 162.639(8)                                           |
| Weight fraction (%)           | 66.61(15)               | 33.3(4)                                              |
| Density (g cm <sup>-3</sup> ) | 8.905                   | 7.047                                                |
| R-factors                     | Phase residuals         |                                                      |
|                               | R <sub>F</sub> =0.0086  | R <sub>F</sub> =0.0663                               |
|                               | Total                   |                                                      |
|                               | R <sub>wp</sub> =0.0242 |                                                      |

|                               |                         |                                                      |
|-------------------------------|-------------------------|------------------------------------------------------|
| Sample                        | Ni 50%, SDC 50%         |                                                      |
| Chemical formula              | Ni                      | Ce <sub>0.8</sub> Sm <sub>0.2</sub> O <sub>1.9</sub> |
| Crystal system                | Cubic                   | Cubic                                                |
| Space group                   | <i>Fm-3m</i>            | <i>Fm-3m</i>                                         |
| Unit cell dimensions (Å)      | <i>a</i> = 3.52425(1)   | <i>a</i> = 5.45852(6)                                |
| Volume (Å <sup>3</sup> )      | 43.772(1)               | 162.639(5)                                           |
| Weight fraction (%)           | 56.86(16)               | 43.13(47)                                            |
| Density (g cm <sup>-3</sup> ) | 8.907                   | 7.047                                                |
| R-factors                     | Phase residuals         |                                                      |
|                               | R <sub>F</sub> =0.015   | R <sub>F</sub> =0.0371                               |
|                               | Total                   |                                                      |
|                               | R <sub>wp</sub> =0.0200 |                                                      |

|                  |                 |                                                      |
|------------------|-----------------|------------------------------------------------------|
| Sample           | Ni 40%, SDC 60% |                                                      |
| Chemical formula | Ni              | Ce <sub>0.8</sub> Sm <sub>0.2</sub> O <sub>1.9</sub> |

|                               |                         |                        |
|-------------------------------|-------------------------|------------------------|
| Crystal system                | Cubic                   | Cubic                  |
| Space group                   | <i>Fm-3m</i>            | <i>Fm-3m</i>           |
| Unit cell dimensions (Å)      | <i>a</i> = 3.52423(1)   | <i>a</i> = 5.45944(4)  |
| Volume (Å <sup>3</sup> )      | 43.772(1)               | 162.722(4)             |
| Weight fraction (%)           | 46.13(16)               | 53.86(47)              |
| Density (g cm <sup>-3</sup> ) | 8.907                   | 7.044                  |
| R-factors                     | Phase residuals         |                        |
|                               | R <sub>F</sub> =0.0070  | R <sub>F</sub> =0.0236 |
|                               | Total                   |                        |
|                               | R <sub>wp</sub> =0.0176 |                        |

| Sample                        | SDC 100%                |                                                      |
|-------------------------------|-------------------------|------------------------------------------------------|
| Chemical formula              | -                       | Ce <sub>0.8</sub> Sm <sub>0.2</sub> O <sub>1.9</sub> |
| Crystal system                | -                       | Cubic                                                |
| Space group                   | -                       | <i>Fm-3m</i>                                         |
| Unit cell dimensions (Å)      | -                       | <i>a</i> = 5.45816(17)                               |
| Volume (Å <sup>3</sup> )      | -                       | 162.607(16)                                          |
| Weight fraction (%)           | -                       | 100                                                  |
| Density (g cm <sup>-3</sup> ) | -                       | 7.049                                                |
| R-factors                     | Phase residuals         |                                                      |
|                               | -                       | R <sub>F</sub> =0.0252                               |
|                               | Total                   |                                                      |
|                               | R <sub>wp</sub> =0.0577 |                                                      |

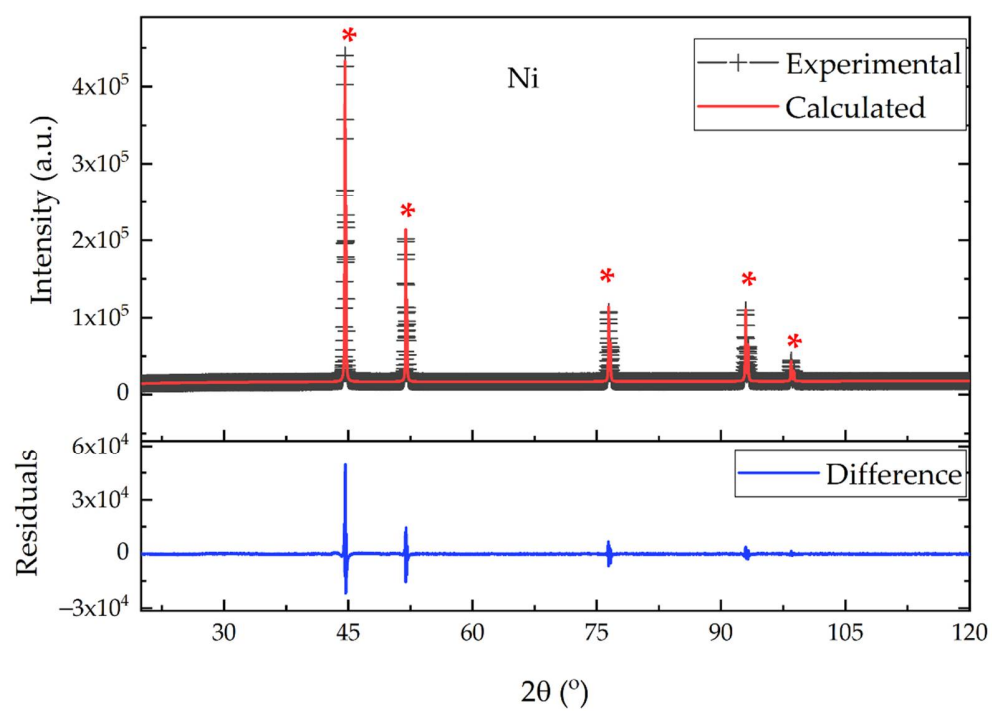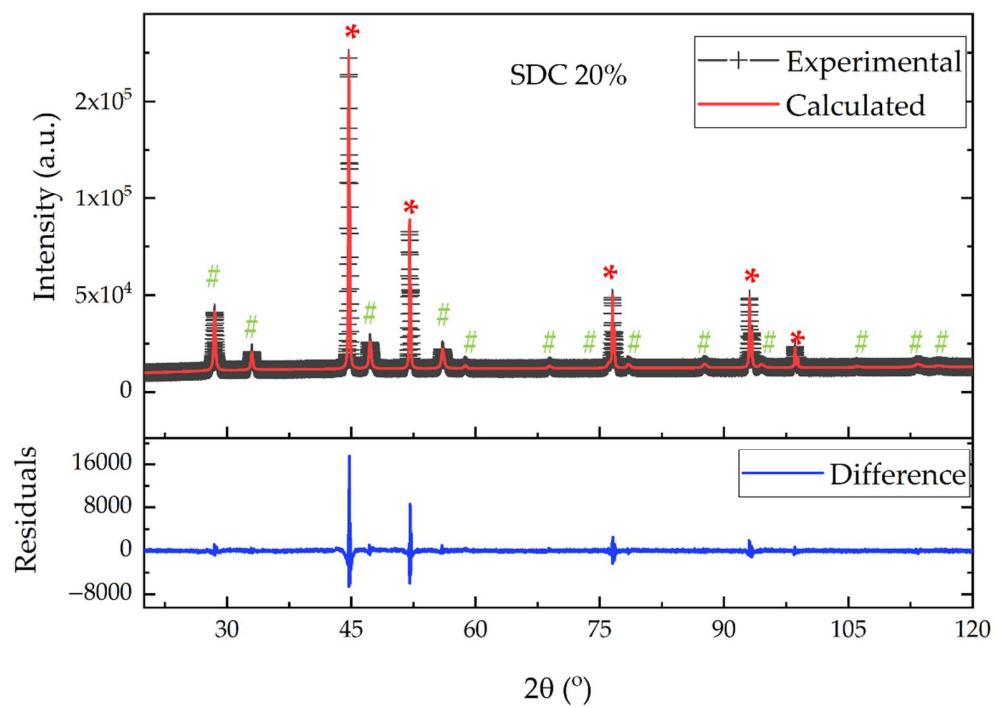

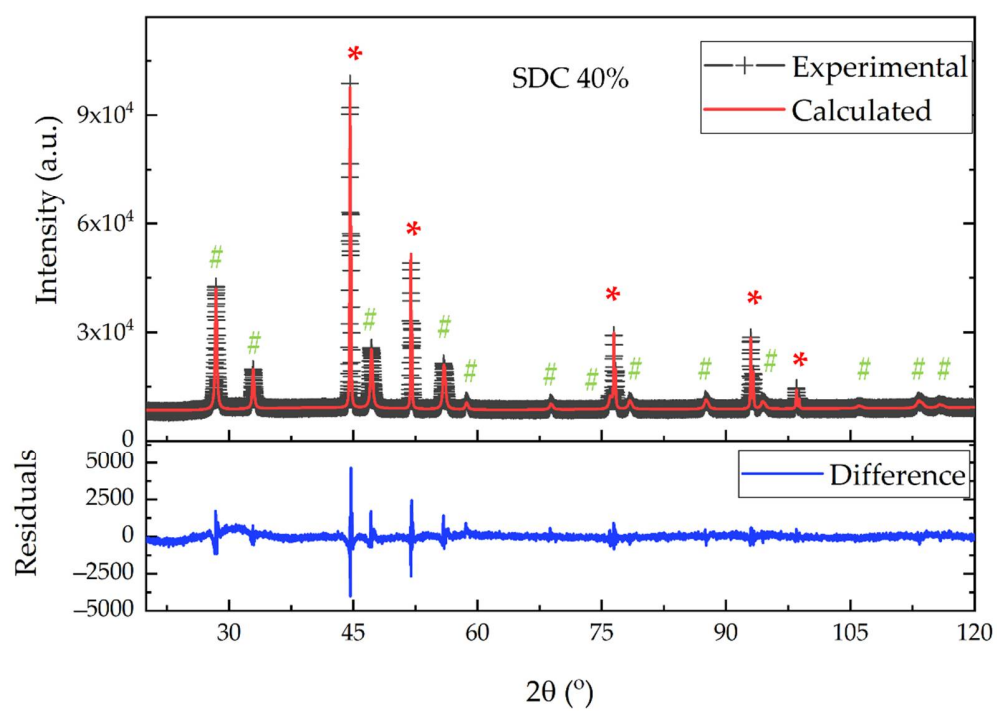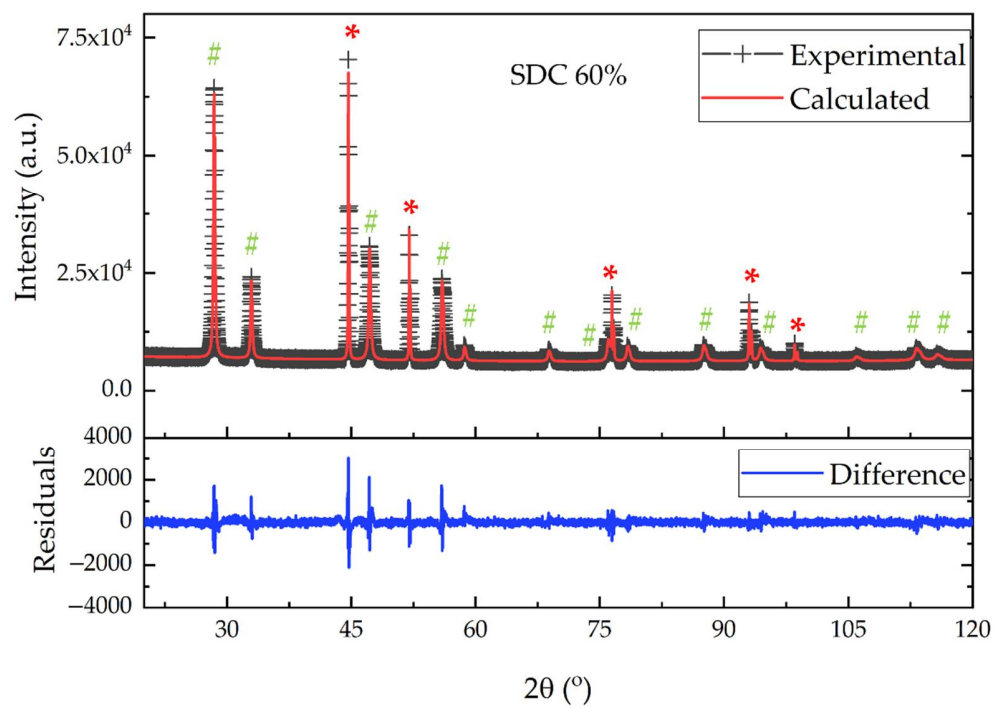

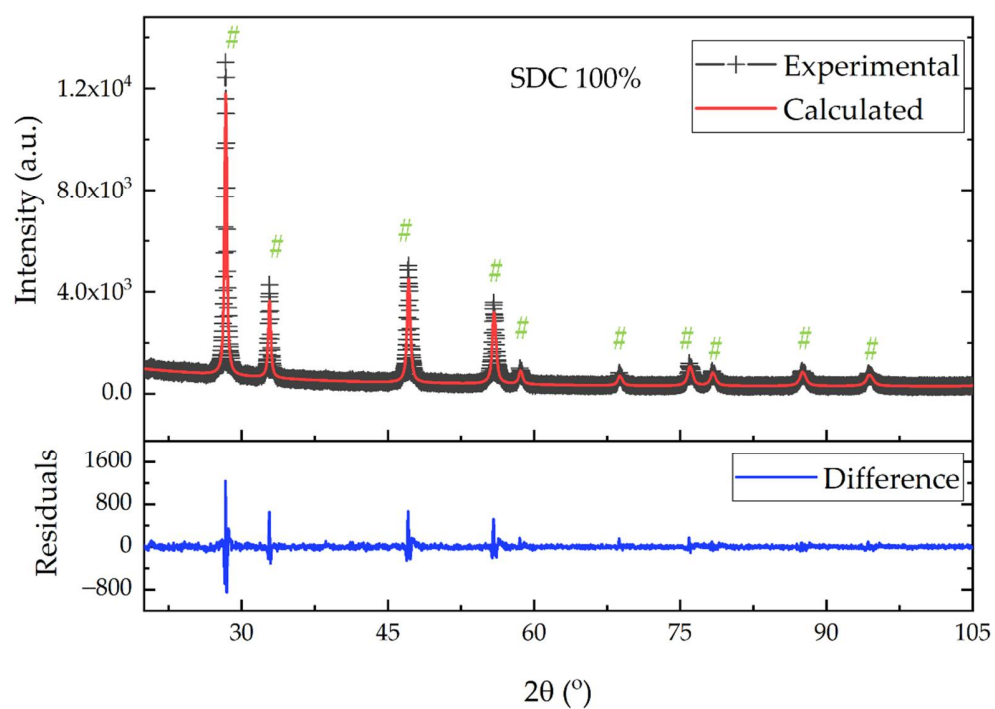

Figure S1. Fitted X-ray diffraction profiles for composite materials. Observed (+ black symbols), calculated (red line), and difference (blue line, lower) profiles are shown. Reflection positions of Ni and SDC phases are indicated by red "\*" and green "#" symbols, respectively.
